# Supplementary material
Source: PubMed Central journal article supplement (PMC2729315)
Supplement: NIHMS110011-supplement-supp_data.pdf [file NIHMS110011-supplement-supp_data.pdf]

## Supplemental Data

### The Mirtron Pathway Generates MicroRNA-Class Regulatory RNAs in *Drosophila*

Katsutomo Okamura, Joshua W. Hagen, Hong Duan, David M. Tyler, and Eric C. Lai

#### Supplemental Experimental Procedures

1. Genomic pri-mirtron expression constructs.

We used the following primer pairs to amplify ~400 nt pri-miRtron fragments from Canton S genomic DNA. These were cloned into the NotI/XbaI sites in the 3' UTR of UAS-DsRed (Stark et al., 2003) and sequence verified.

*mir-1003* for: GGGgcggccgcGTGAACGACTGCAACAGCA  
rev: GggtctagaCTTGTGCGTCTCCTCCTTTC

*mir-1010* for: GGGgcggccgcAAGGGCGACCTTATCGATGT  
rev: GggtctagaGGTTGAGAATGCCCAGGTAA

*mir-1004* for: GGGgcggccgccgagggtattccatgtacg  
rev: Gggtctagagagcagcagcatccttagaa

2. "Intron" mirtron expression constructs.

We first generated a UAS-DsRed-myc vector with in-frame cloning sites between the DsRed and 2xmyc coding sequences. The top strand is shown below.

```
          DsRed2                Asc                Not I                stop XhoI
5'CGC CAC CAC CTG TTC CTG GCG CGC Cag insert at G CGG CCG Cag 2xmyc TAA CTCGAG GGG 3'
   R  H  H  L  F  L  A  R  Q                M  R  P  Q
```

The top strand sequence of 2xmyc is:

ATGGAGCAAAAGCTCATTCTGAAGAGGACTTGAATGAAATGGAGCAAAAGCTCATTCTGAAGAGGACTTGAATGAA

In the "empty" vector, the insert position is occupied by the small *white* intron:

GTGAGTTTCTATTTCGACAGTCGGCTGATCTGTGTGAAATCTTAATAAAGGGTCCAATTACCAATTTGAAACTCAG

We then cloned the following oligo pairs into *Ascl*/*NotI*-digested UAS-DsRed[intron]myc vector. Note that the *Ascl* and *NotI* sites are destroyed in the process; *SpeI* was introduced as a marker site.

```
miR-1003
CGCGaactagtagtacacagGTGGGTATCTGGATGTGGTTGGCTCTGGCGGTCTCTCACATTTACATATTCACAGatcaaac
ttgatcatgtgtcCACCCATAGACCTACACCAACCgagaccgccaggAGAGTGTAAATGTATAAGTGTctagtttgCCGG

miR-1003Gmut
CGCGaactagtagtacacagGTGGGTATCTGGATGTGGTctctggcggtccTCTCACATTTACATATTCACAGatcaaac
ttgatcatgtgtcCACCCATAGACCTACACCAACCgagaccgccaggAGAGTGTAAATGTATAAGTGTctagtttgCCGG

miR-1008
CGCGaactagtagtacacagGTAATATCTAAAGTTGAACTtggccaatggcaagTCACAGCTTTTTGTGTTTACAGatcaaac
ttgatcatgtgtcCATTTATAGATTTCAACTTGAaccggttaccggttcAGTGTGCGAAAAACACAAATGTctagtttgCCGG

miR-1008Gmut
CGCGaactagtagtacacagGTAATATCTAAAGTTGAACTtggccaatggcaagTCACAGCTTTTTGTGTTTACAGatcaaac
ttgatcatgtgtcCATTTATAGATTTCAACTTGAaccggttaccggttcAGTGTGCGAAAAACACAAATGTctagtttgCCGG
```

### 3. Hybrid pri-miRNA/mirtron construct.

The miR-1003 sequence was substituted into a pri-miR-6-1 fragment, with appropriate changes on the miRNA\* sequence to maintain pairing. The following sequence (top strand only shown) was digested and cloned into the *NotI* and *XbaI* sites of UAS-DsRed.

```
5' GGG GTCGAC GCGGCCGC
ttactaaactaatcacagccttaatgtctGTGGATATGTgCATGTGCGGTAagttaatataccatatctaTC
TCACATTTACATATTCACAG gtacctaaagtgcctaacatcattattaatt
CTCGAG TCTAGA GGG 3'
```

### 4. Luciferase sensor constructs.

We modified *psiCheck2* (Promega) by inserting the following oligo pair into *Sall*/*NotI*-digested vector.

```
SalI SacI NotI XbaI SalI EcoRI EcoRV XhoI SpeI
5' TCGACGAGCTCGCGGCCGCTCTAGAGTCGACGAATTCGATATCCTCGAGACTAGTC 3'
3' GCTCGAGCGCCGGCGAGATCTCAGCTGCTTAAGCTATAGGAGCTCTGATCAGCCGG 5'
```

Sensors were then cloned by inserting the following oligo pairs into the *NotI*/*XhoI* sites of modified *psiCheck*.

miR-1003 sensor

```
GGCCGCctgtgaatatgtaaattgtgagaatcacctgtgaatatgtaaattgtgagac
CGgacacttatacattttacactcttttagtggacacttatacattttacactctgagct
```

miR-1003 seed mut sensor

```
GGCCGCctgtgaatatgtaaattCtCaCaaatcacctgtgaatatgtaaattCtCaCac
CGgacacttatacattttaGAGtGtttagtggacacttatacattttaGAGtGtgagct
```

miR-1004 sensor

```
GGCCGCctgtgaggggaagtgatgtgagaatcacctgtgaggggaagtgatgtgagac
CGgacactcccttcactacactcttttagtggacactcccttcactacactctgagct
```

miR-1004 seed mut sensor

```
GGCCGCctgtgaggggaagtgatCtCaCaaatcacctgtgaggggaagtgatCtCaCac
CGgacactcccttcactaGAGtGtttagtggacactcccttcactaGAGtGtgagct
```

For the miR-1010 miRNA-type sensor (in which the three central bases are unpaired), we cloned a 4-copy multimer of the following oligos into the Sal/XhoI sites of modified psiCheck.

miRtron-2 mi-sensor

```
tcgacaaa CTGCAAATGGAAatcTAGGTGAAA aaac
gttt GACGTTTACCTTtagATCCACTTT tttgagct
```

## 5. GFP sensor transgenes.

The oligo pairs for miR-1003 and miR-1004 sensors were cloned into the NotI/XhoI sites in the 3' UTR of tub-GFP-SV40 3'UTR (Brennecke et al., 2005).

## 6. pLitmus templates for synthesis of dsRNA.

The following PCR primers were used to clone fragments of *Ldbr*, *Drosophila Exp5*, *Ago1* and *Ago2* into the XhoI-XbaI sites of pLitmus (NEB). This vector contains opposing T7 promoters flanking the cloning site and were used to synthesize dsRNA using the Megascript kit (Ambion).

dDBR:

```
XhoI-dDBR-1125+ AGAGCTCGAGTGAAGACGAGGAAAGGGAGA
XbaI-dDBR-1549- AGAGGTCTAGACGTATTGCTCTGGGGTTTA
```

Exp5N:

```
XhoI-Exp5-110+ AGAGCTCGAGCCTGTGAGCGGTTTAAGGAG
XbaI-Exp5-487- AGAGGTCTAGAGTCGCAAGAAGACCAGAAGC
```

Exp5C:

XhoI-Exp5-2917+ AGAGCTCGAGCTGGAGGATCAGCTCAATCG  
XbaI-Exp5-3406- AGAGGTCTAGAGACGGAGCAGCTCGTAGAAC

Ago1:

XhoI-Ago1-2497+ AGAGCTCGAGTCTCCGAGGGACAATTCC  
XbaI-Ago1-2896- AGAGGTCTAGAGCCACTAAATGGGCGTAGT

Ago2:

XhoI-Ago2-2475+ AGAGCTCGAGTATGGTGAAGAACGGGTCGT  
XbaI-Ago2-2928- AGAGGTCTAGACTTGTGGTTGATGCCGTTC

Other templates in pLitmus were obtained from Phil Zamore (Forstemann, 2005).

## 7. Quantitative reverse transcription-PCR analysis (Q-PCR).

Q-PCR was performed with Thermo-X One Step RT-PCR Platinum Taq HiFi (Invitrogen) and SYBR Green (ABI) using a MyiQ Real-Time PCR Detection System (BioRad) and the included software package.

Primers for Q-PCR analysis of the *actin* intron.

Act5Cint-103+ CGGGTTCCAATTCGAGTTTT  
Act5Cint-226- GAAAAGGGAGGGGAGAAGC

Primers for control amplification of the *rp49* gene.

rp49 A2        ATCGGTTACGGATCGAACA  
rp49 B2        ACAATCTCCTTGCGCTTCTT

## 8. Ago-1 co-immunoprecipitation assay.

Assay was modified from a published protocol (Miyoshi et al., 2005). 0-10 h embryos (~400ul) were collected and dechorionated in bleach. Embryos were then homogenized with 5-6 strokes of a chilled dounce homogenizer (Kontes) in 2ml of HEPES-NP40 buffer (30 mM HEPES (pH 7.4), 100 mM sodium chloride, 2 mM magnesium acetate, 5mM DTT and 0.1% NP40). Ago1 complex was purified from embryo lysate using anti-Ago1 antibody immobilized on Gamma-Bind beads (Amersham Bioscience). Sodium chloride was added to the lysates to 800 mM just before immunoprecipitation was started. The reaction mixtures were rocked at 4°C for 1.5 h,

and the beads washed extensively with a buffer containing 30 mM HEPES (pH 7.4), 800 mM sodium chloride, 2 mM magnesium acetate, 5 mM DTT and 0.1% NP40. The final wash was carried out with HEPES-NP40 buffer containing 100mM NaCl. Proteins were eluted with SDS sample buffer without DTT. DTT was added to the eluate up to 100mM before boiling. RNAs were isolated from immunoprecipitate with Phenol/Chloroform/Isoamylalcohol (Sigma). Anti-T7 tag mouse monoclonal antibody (Novagen) was used as a control antibody in parallel immunoprecipitations. 20% (Protein) or 15% (RNA) of the input and supernatants and 100% of the immunoprecipitates were analyzed by Western or Northern blot.

**Figure S1. Additional examples of well-conserved and rapidly-evolving mirtrons**

Alignments and conservation data were produced by the UCSC Genome Center (<http://genome.ucsc.edu/>). Gold tracks depict the positions of cloned small RNAs, the blue track depicts the exon/intron structure of host genes, and the black tracks at bottom depict nucleotide conservation of the region across 12 Drosophilid species. Greater height of the “conservation” track reflects deeper sequence conservation. Note that the terminal loop region (red arrows) exhibits accelerated divergence relative to the mirtron hairpin arms in both well-conserved (A) and poorly-conserved (B) mirtrons.

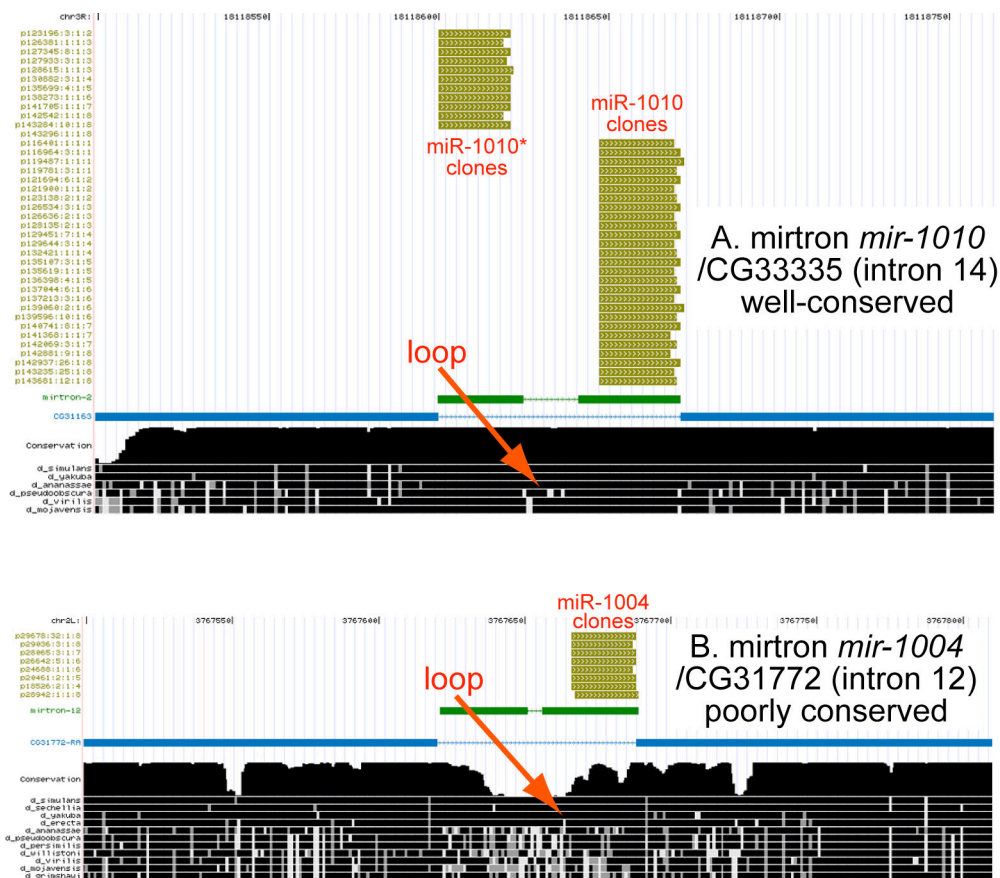

**Figure S2. Confirmation of dsRNA knockdowns**

A. Effective knockdown of Dcr-1 and Drosha in S2 cells. Western blot for Dcr-1 and Drosha accumulation showed little effect with non-cognate dsRNAs, but >90% knockdown with cognate dsRNAs.  $\alpha$ -tubulin was used as a loading control.

B. Ldbr knockdown. (Left) S2 knockdown. Cells were treated with dsRNAs against *GFP*, *Drosha* or *Ldbr*. Quantitative rt-PCR demonstrated accumulation of the *actin* intron relative to an *rp49* control in *Ldbr* knockdown cells. Threshold cycle and baseline curves were determined using the software included with the MyiQ real-time PCR instrument (BioRad) and used to calculate mean fold changes from 4 independent samples of dsRNA-treated cells. Error bars represent standard deviations. (Right) Transgenic knockdown. RNA was extracted from three independent samples each of Canton S (control) or *da-Gal4, UAS-Ldbr<sup>RNAi</sup>* late third instar larvae and analyzed in the same way.

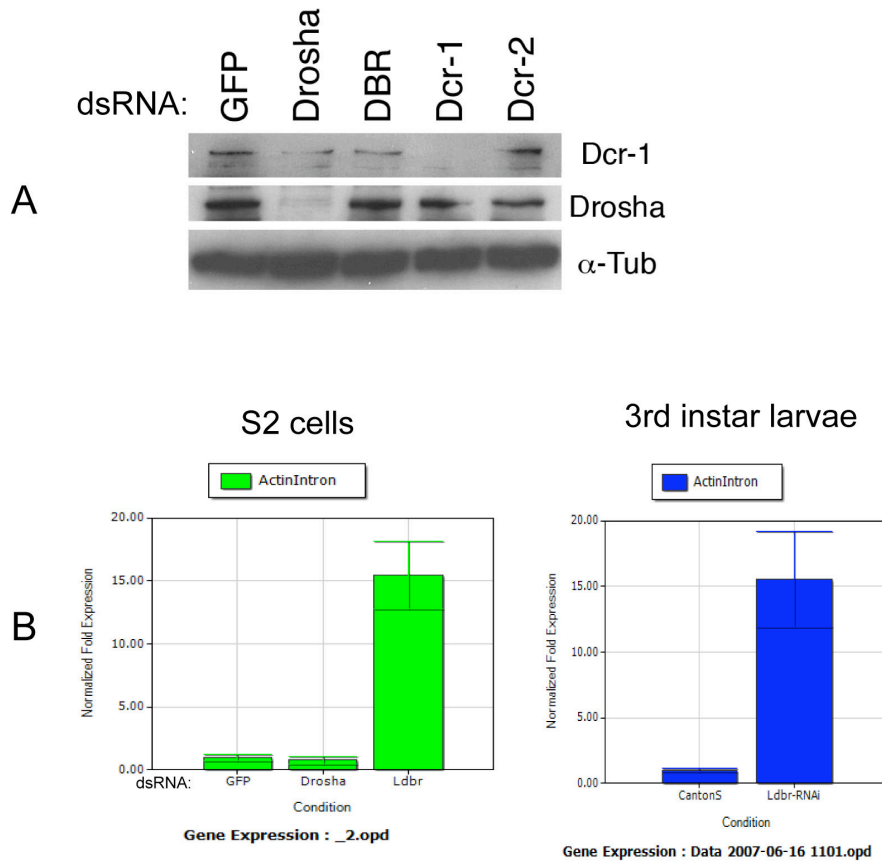

**Figure S3. Quantification of the effect of *Ldbr* knockdown on mirtron maturation in transgenic animals**

Three separate isolates of RNA from Canton S (control) and *da-Gal4>UAS-Ldbr<sup>RNAi</sup>* larvae were blotted and probed sequentially for miR-1010 and miR-1. Phosphorimager analysis was performed, and the mean ratio of mature miR-1010 to miR-1 was calculated; this ratio was set to unity in control samples. Error bar represents standard deviation.

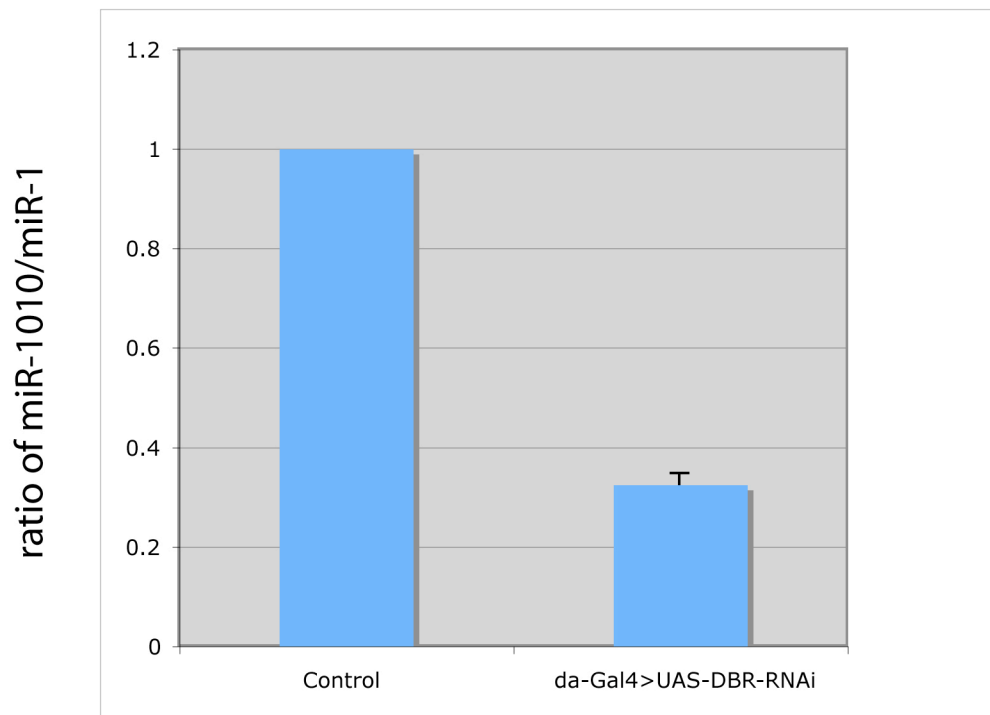



**Figure S4. Effect of *Exportin-5* dsRNA on the maturation of endogenous miRNAs and exogenous mirtrons**

S2 cells were treated with dsRNAs against *GFP* or two different regions of *Exportin-5* (*Exp5-N* and *Exp5-C*), then transfected with *ub-Gal4* and *UAS-DsRed-small RNA* expression constructs. Treatment with either *Exp5* dsRNA decreased the level of mature miR-2b (lanes 1-3), as reported previously (Shibata et al., 2006). *Exp5* dsRNAs also reduced the steady state levels of hairpin and mature small RNAs derived from *mir-1003* (lanes 4-6) and *mir-1010* (lanes 7-9) mirtron expression constructs.

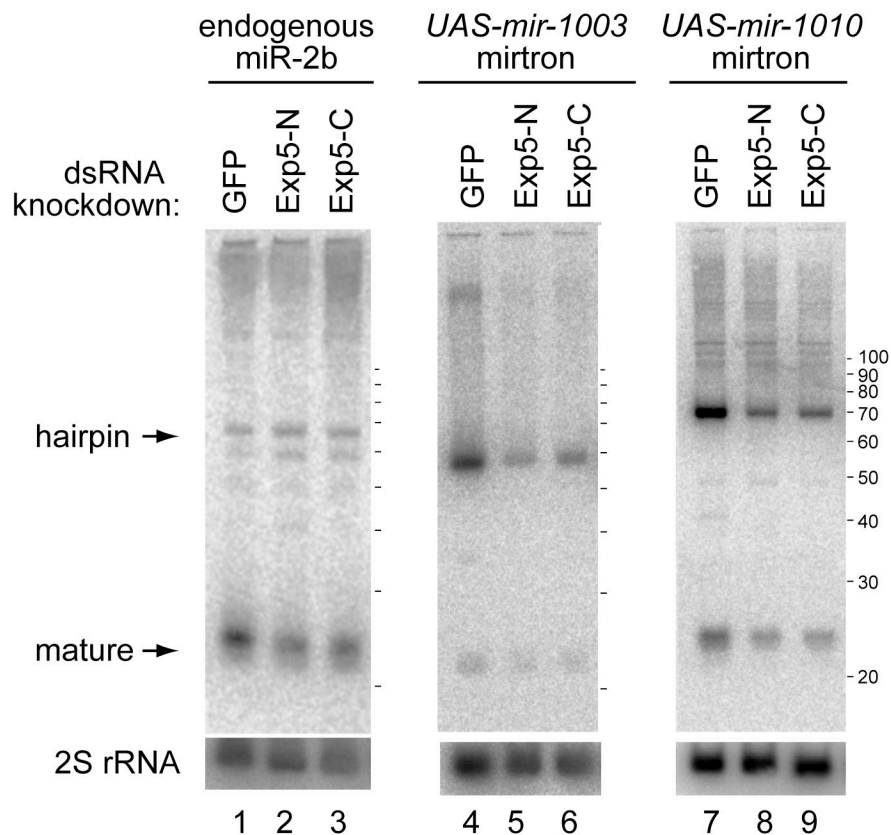

**Figure S5. Similarities between *mir-10* and a mirtron located in *VhaSFD***

Shown are alignments of the precursors of the *mir-10* and *Vha-SFD* mirtron genes between the highly diverged species *D. virilis* (*Dv*) and *D. melanogaster* (*Dm*). The clone numbers are given as approximate since ~10% of clones have different termini (likely due to end degradation). The major, mature small RNAs produced from these loci are highly related across their 5' halves (green shade), and share an identical seed (AAAUUCG). Note that the predominant small RNA produced from *Drosophila mir-10* is not the left arm, "5p" miRNA (Aravin et al., 2003) but rather the right arm, "3p" miRNA (Schwarz et al., 2003).

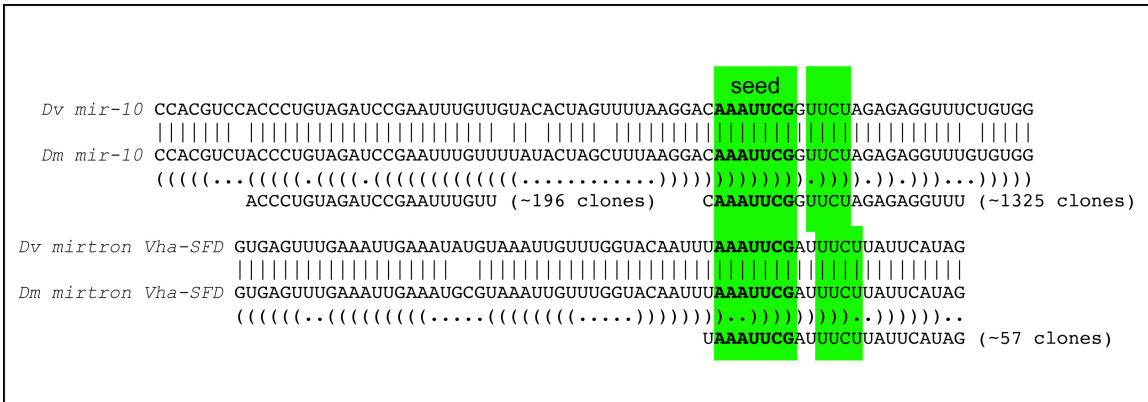

## Supplemental References

Aravin, A., Lagos-Quintana, M., Yalcin, A., Zavolan, M., Marks, D., Snyder, B., Gaasterland, T., Meyer, J., and Tuschl, T. (2003). The small RNA profile during *Drosophila melanogaster* development. *Dev Cell* 5, 337-350.

Brennecke, J., Stark, A., Russell, R. B., and Cohen, S. M. (2005). Principles of MicroRNA-Target Recognition. *PLoS Biol* 3, e85.

Miyoshi, K., Tsukumo, H., Nagami, T., Siomi, H., and Siomi, M. C. (2005). Slicer function of *Drosophila* Argonautes and its involvement in RISC formation. *Genes Dev* 19, 2837-2848.

Schwarz, D. S., Hutvagner, G., Du, T., Xu, Z., Aronin, N., and Zamore, P. D. (2003). Asymmetry in the assembly of the RNAi enzyme complex. *Cell* 115, 199-208.

Shibata, S., Sasaki, M., Miki, T., Shimamoto, A., Furuichi, Y., Katahira, J., and Yoneda, Y. (2006). Exportin-5 orthologues are functionally divergent among species. *Nucleic Acids Res* 34, 4711-4721.

Stark, A., Brennecke, J., Russell, R. B., and Cohen, S. M. (2003). Identification of *Drosophila* MicroRNA Targets. *PLoS Biol* 1, E60.
